# Supplementary material for: Optimizing carbon nanoparticle staining for sentinel lymph nodes in rabbit lower limb models: concentration and time dependence
Source: PeerJ journal article supplement (doi:10.7717/peerj.19799), 2025-07-31
Supplement: grey_scale.xlsx [file grey_scale.xlsx]

## Sheet: Sheet1
	grey scale	area
0.195
1	1437626	20578
2	1447436	22317
3	2156799	25887
4	1994183	33432
5	2133455	22580
6	2356121	24014
7	1835651	26012
8	1314684	19715
0.39
1	1640626	18004
2	1245786	16745
3	1296384	13894
4	1453703	16725
5	1576068	20183
6	1600377	20764
7	1010211	15278
8	1754362	17404
0.78
1	2778001	26943
2	2451502	19729
3	2555094	19451
4	2839585	21728
5	2623171	24225
6	2746794	23360
7	2883724	21929
8	3214362	24113
1.5625
1	1982809	11784
2	1415253	7588
3	2357289	14784
4	1306048	7816
5	2448338	12496
6	1449346	8200
7	2228692	13181
8	2699957	14433
3.125
1	2347799	12835
2	1993954	11411
3	1808027	11769
4	3003939	18614
5	2499219	13900
6	2084856	11855
7	2473415	14284
8	2340810	13449
6.25
1	3437321	19895
2	3124552	18893
3	1900337	10440
4	1476148	8921
5	2492953	13717
6	1969005	10708
7	3710806	25735
8	2241193	11167
4h
1	228776	1570
2	251649	1889
3	254790	1953
4	346330	2295
8h
1	238103	1480
2	218656	1353
3	268129	1660
4	310432	2164
12h
1	275147	1612
2	187665	1165
3	453307	2624
4	420307	2829
16h
1	233420	1224
2	289942	1481
3	305393	1581
4	341638	1971
