# Supplementary material for: Optimizing carbon nanoparticle staining for sentinel lymph nodes in rabbit lower limb models: concentration and time dependence
Source: PeerJ journal article supplement (doi:10.7717/peerj.19799), 2025-07-31
Supplement: MIQE_checklist.xls [file MIQE_checklist.xls]

## Sheet: Sheet1
ITEM TO CHECK	IMPORTANCE	CHECKLIST
EXPERIMENTAL DESIGN
Definition of experimental and control groups	E	control vs. CNPs treated ,Abstract Section, Line 24
Number within each group	E	6 vs. 6 ,Abstract Section, Line 24
Assay carried out by core lab or investigator's lab?	D	by investigator's lab Line 24
Acknowledgement of authors' contributions	D
SAMPLE
Description	E	total RNA from rabbit's lymph node tissues with or without CNPs treated Line102
Volume/mass of sample processed	D
Microdissection or macrodissection	E	macrodissection ,The effects of prolonged retention of CNPs in SLNB Section, line 102
Processing procedure	E	no frozen and no fixed Line 102
If frozen - how and how quickly?	E	no
If fixed - with what, how quickly?	E	no
Sample storage conditions and duration (especially for FFPE samples)	E	fresh tissue ,The effects of prolonged retention of CNPs in SLNB Section, line 102
NUCLEIC ACID EXTRACTION
Procedure and/or instrumentation	E	Trizol (#R0016, Beyotime, China)The effects of prolonged retention of CNPs in SLNB Section, line 102
Name of kit and details of any modifications	E	Trizol (#R0016, Beyotime, China) The effects of prolonged retention of CNPs in SLNB Section, line 102
Source of additional reagents used	D	4℃ ,The effects of prolonged retention of CNPs in SLNB Section, line 102
Details of DNase or RNAse treatment	E	no
Contamination assessment (DNA or RNA)	E	evaluation by agarose gel electrophoresis ,The effects of prolonged retention of CNPs in SLNB Section, line 102
Nucleic acid quantification	E	NanoDrop spectrophotometer (Thermo Fisher Scientific) ,The effects of prolonged retention of CNPs in SLNB Section, line 102
Instrument and method	E	NanoDrop spectrophotometer (Thermo Fisher Scientific),The effects of prolonged retention of CNPs in SLNB Section, line 102
Purity (A260/A280)	D	1.99-2.01 Line 102
Yield	D
RNA integrity method/instrument	E	evaluation by agarose gel electrophoresis ,The effects of prolonged retention of CNPs in SLNB Section, line 102
RIN/RQI or Cq of 3' and 5' transcripts	E	not applicable
Electrophoresis traces	D	yes,Line 102
Inhibition testing (Cq dilutions, spike or other)	E	not applicable
REVERSE TRANSCRIPTION
Complete reaction conditions	E	42℃ 60min；80℃ 10min ,The effects of prolonged retention of CNPs in SLNB Section, line 102
Amount of RNA and reaction volume	E	1ug RNA, volume 20ul,The effects of prolonged retention of CNPs in SLNB Section, line 102
Priming oligonucleotide (if using GSP) and concentration	E	Oligo(dT)18 primer 1ul,The effects of prolonged retention of CNPs in SLNB Section, line 102
Reverse transcriptase and concentration	E	use mix，Reaction Buffer (5X) 4ul ,The effects of prolonged retention of CNPs in SLNB Section, line 102
Temperature and time	E	42℃ 60min；80℃ 10min The effects of prolonged retention of CNPs in SLNB Section, line 102
Manufacturer of reagents and catalogue numbers	D	BeyoRT™ III First Strand cDNA Synthesis Kit (#D7178M, Beyotime, China) The effects of prolonged retention of CNPs in SLNB Section, line 102
Cqs with and without RT	D*	not applicable
Storage conditions of cDNA	D	-80℃,The effects of prolonged retention of CNPs in SLNB Section, line 102
qPCR TARGET INFORMATION
If multiplex, efficiency and LOD of each assay.	E	not applicable
Sequence accession number	E
Location of amplicon	D
Amplicon length	E	100-300bp,The effects of prolonged retention of CNPs in SLNB Section, line 102
In silico specificity screen (BLAST, etc)	E	use NCBI BLAST,The effects of prolonged retention of CNPs in SLNB Section, line 102
Pseudogenes, retropseudogenes or other homologs?	D
Sequence alignment	D
Secondary structure analysis of amplicon	D
Location of each primer by exon or intron (if applicable)	E	primer must span an exon-exon junction if applicable ,Line 112
What splice variants are targeted?	E	all splice variants of each gene were amplified,The effects of prolonged retention of CNPs in SLNB Section, line 102
qPCR OLIGONUCLEOTIDES
Primer sequences	E	in Table 1,Line 122
RTPrimerDB Identification Number	D
Probe sequences	D**	not applicable
Location and identity of any modifications	E	no
Manufacturer of oligonucleotides	D
Purification method	D
qPCR PROTOCOL
Complete reaction conditions	E	95℃ 30s；95℃ 5s, 60℃ 30s cycle 40x; 95℃ melting,Line 102
Reaction volume and amount of cDNA/DNA	E	dilute the reverse transcription product 5-fold and take 1ul,Line 102
Primer, (probe), Mg++ and dNTP concentrations	E	use kit BeyoFast™ SYBR Green qPCR Mix (2X),The effects of prolonged retention of CNPs in SLNB Section, line 102
Polymerase identity and concentration	E	use kit BeyoFast™ SYBR Green qPCR Mix (2X),Line 102
Buffer/kit identity and manufacturer	E	use kit BeyoFast™ SYBR Green qPCR Mix (2X),The effects of prolonged retention of CNPs in SLNB Section, line 102
Exact chemical constitution of the buffer	D
Additives (SYBR Green I, DMSO, etc.)	E	SYBR Green I,Line 102
Manufacturer of plates/tubes and catalog number	D
Complete thermocycling parameters	E	95℃ 30s；95℃ 5s, 60℃ 30s cycle 40x; 95℃ melting,The effects of prolonged retention of CNPs in SLNB Section, line 102
Reaction setup (manual/robotic)	D
Manufacturer of qPCR instrument	E	LightCycler® 480 Instrument II,The effects of prolonged retention of CNPs in SLNB Section, line 102
qPCR VALIDATION
Evidence of optimisation (from gradients)	D
Specificity (gel, sequence, melt, or digest)	E	melt,The effects of prolonged retention of CNPs in SLNB Section, line 102
For SYBR Green I, Cq of the NTC	E	not applicable
Standard curves with slope and y-intercept	E	not applicable
PCR efficiency calculated from slope	E	not applicable
Confidence interval for PCR efficiency or standard error	D
r2 of standard curve	E	not applicable
Linear dynamic range	E	not applicable
Cq variation at lower limit	E	not applicable
Confidence intervals throughout range	D
Evidence for limit of detection	E	not applicable
If multiplex, efficiency and LOD of each assay.	E	not applicable
DATA ANALYSIS
qPCR analysis program (source, version)	E	the 2-ΔΔT method The effects of prolonged retention of CNPs in SLNB Section, line 102
Cq method determination	E	the 2-ΔΔT method ,Line 102
Outlier identification and disposition	E	no
Results of NTCs	E	not applicable
Justification of number and choice of reference genes	E	1 GAPDH ,The effects of prolonged retention of CNPs in SLNB Section, line 102
Description of normalisation method	E	The expression level of a each gene in the control group divided by the mean of the control group is taken as the expression level of each sample in the control group, so that the mean of the control group is 1 Line102
Number and concordance of biological replicates	D
Number and stage (RT or qPCR) of technical replicates	E	3,Line 102
Repeatability (intra-assay variation)	E	not applicable
Reproducibility (inter-assay variation, %CV)	D
Power analysis	D
Statistical methods for result significance	E	t test,Line 123
Software (source, version)	E	GraphPad Prism v8.0.2.263 Line 123
Cq or raw data submission using RDML	D
Table 1. MIQE checklist for authors, reviewers and editors. All essential information (E) must be submitted with the manuscript. Desirable
information (D) should be submitted if available. If using primers obtained from RTPrimerDB, information on qPCR target, oligonucleotides,
protocols and validation is available from that source.
*: Assessing the absence of DNA using a no RT assay is essential when first extracting RNA. Once the sample has been validated as
RDNA-free, inclusion of a no-RT control is desirable, but no longer essential.
**: Disclosure of the probe sequence is highly desirable and strongly encouraged. However, since not all commercial pre-designed assay
vendors provide this information, it cannot be an essential requirement. Use of such assays is advised against.
