# Supplementary material for: Optimizing carbon nanoparticle staining for sentinel lymph nodes in rabbit lower limb models: concentration and time dependence
Source: PeerJ journal article supplement (doi:10.7717/peerj.19799), 2025-07-31
Supplement: PCR.xlsx [file PCR.xlsx]

## Sheet: Sheet1
		C1-1	C1-2	C2-1	C2-2	C3-1	C3-2	T1-1	T1-2	T2-1	T2-2	T3-1	T3-2
	GAPDH	22.69	22.36	23.36	23.48	23.84	23.9	23.33	23.45	21.65	21.78	23.64	23.98
	IL-6	30.36	30.78	31.26	31.65	31.6	31.78	31.54	31.69	30.06	29.95	31.68	31.46
	TNF-a	34.36	34.65	35.1	35.69	35.66	35.78	35.03	35.23	34.22	34.65	35.6	35.45
	Bcl-2	34.23	34.66	35.31	35.64	35.3	35.12	35.45	35.19	33.4	33.68	35.41	35.73
	BAX	32.15	32.65	34.21	34.48	34.12	34.36	34.85	34.6	32.64	32.47	34.1	34.23
	a-SMA	23.65	23.46	24.36	24.56	24.32	24.36	24.45	24.63	22.32	22.64	24.62	24.3
	Collagen-I	26.36	26.45	27.32	27.15	27.03	27.36	27.2	27.65	24.65	24.3	27.62	27.3
			GAPDH		GAPDH		GAPDH		GAPDH		GAPDH		GAPDH
mean	IL-6	30.57	22.525	31.455	23.42	31.69	23.87	31.615	23.39	30.005	21.715	31.57	23.81
	TNF-a	34.505	22.525	35.395	23.42	35.72	23.87	35.13	23.39	34.435	21.715	35.525	23.81
	Bcl-2	34.445	22.525	35.475	23.42	35.21	23.87	35.32	23.39	33.54	21.715	35.57	23.81
	BAX	32.4	22.525	34.345	23.42	34.24	23.87	34.725	23.39	32.555	21.715	34.165	23.81
	a-SMA	23.555	22.525	24.46	23.42	24.34	23.87	24.54	23.39	22.48	21.715	24.46	23.81
	Collagen-I	26.405	22.525	27.235	23.42	27.195	23.87	27.425	23.39	24.475	21.715	27.46	23.81
🔺T	IL-6	8.045		8.035		7.82		8.225		8.29		7.76
	TNF-a	11.98		11.975		11.85		11.74		12.72		11.715
	Bcl-2	11.92		12.055		11.34		11.93		11.825		11.76
	BAX	9.875		10.925		10.37		11.335		10.84		10.355
	a-SMA	1.03		1.04		0.47		1.15		0.765		0.65
	Collagen-I	3.88		3.815		3.325		4.035		2.76		3.65
mean	IL-6	7.96667		7.96667		7.96667		7.96667		7.96667		7.96667
	TNF-a	11.935		11.935		11.935		11.935		11.935		11.935
	Bcl-2	11.7717		11.7717		11.7717		11.7717		11.7717		11.7717
	BAX	10.39		10.39		10.39		10.39		10.39		10.39
	a-SMA	0.846667		0.846667		0.846667		0.846667		0.846667		0.846667
	Collagen-I	3.67333		3.67333		3.67333		3.67333		3.67333		3.67333
🔺🔺T	IL-6	0.0783333		0.0683333		-0.146667		0.258333		0.323333		-0.206667
	TNF-a	0.045		0.04		-0.085		-0.195		0.785		-0.22
	Bcl-2	0.148333		0.283333		-0.431667		0.158333		0.0533333		-0.0116667
	BAX	-0.515		0.535		-0.02		0.945		0.45		-0.035
	a-SMA	0.183333		0.193333		-0.376667		0.303333		-0.0816667		-0.196667
	Collagen-I	0.206667		0.141667		-0.348333		0.361667		-0.913333		-0.0233333
2^-🔺🔺T	IL-6	0.947151		0.953739		1.10701		0.836053		0.799221		1.15402
	TNF-a	0.96929		0.972655		1.06069		1.14472		0.580352		1.16473
	Bcl-2	0.902292		0.82169		1.34879		0.89606		0.963707		1.00812
	BAX	1.42899		0.690159		1.01396		0.51943		0.732043		1.02456
	a-SMA	0.880666		0.874583		1.29834		0.810378		1.05824		1.14605
	Collagen-I	0.866537		0.906471		1.27309		0.778265		1.88339		1.0163
